# Supplementary material
Source: PubMed Central journal article supplement (PMC2981145)
Supplement: NIHMS249583-supplement-S1.pdf [file NIHMS249583-supplement-S1.pdf]

**Tam et al., Supplementary information**

## Table of Contents

Figure S1 – analysis of small RNA population with 1-2 mismatches to the genome

Figure S2 – properties of oocyte piRNA and siRNA

Figure S3 – distribution of piRNAs and siRNAs along L1 and IAP consensus sequences

Figure S4 – siRNAs with perfect match to Ppp4r1 splice junction

Figure S5 – enrichment of GO categories for endo-siRNA regulated genes

Table S1 – characteristics of oocyte small RNA population

Table S2 – small RNA fractions mapped to transposons

Table S3 – genomic positions of oocyte piRNA clusters

Table S4 – microRNAs in oocytes

Table S5 – potential regulatory targets of endogenous siRNAs

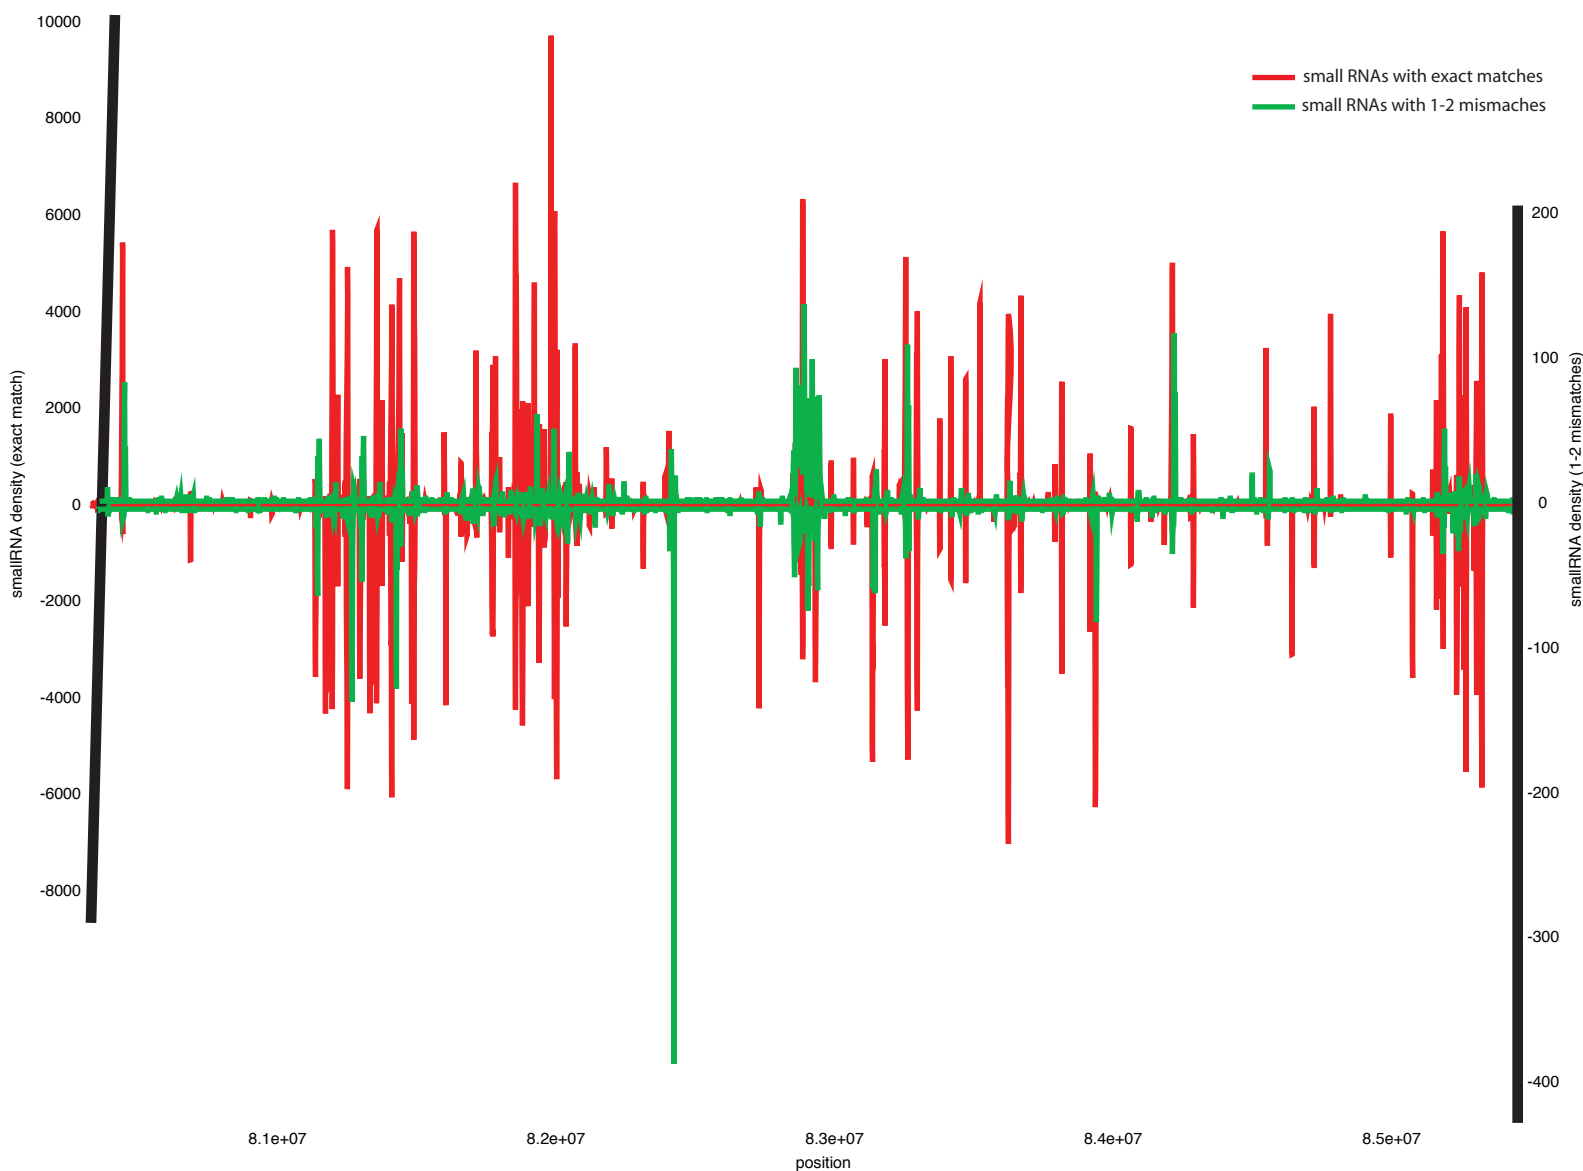

Figure S1: Analysis of small RNA population with 1-2 mismatches to the genome. Using a mapping protocol that takes into account 1-2 mismatches, we looked at the small RNA distribution at chromosome 10: 80327123-85445335. This is an ~5Mb region with the most prominent oocyte piRNA cluster in the middle, heavy in repetitive elements. The small RNAs that have been mapped with no mismatches are green, while those that have 1-2 mismatches are in red (in both cases, using the 24-30 nt. fraction). As shown in the graph, the number of small RNAs with mismatches in this region is a factor of 10 less than those contributed by perfect matches, and largely conform to the relative peaks of small RNAs in the region. This suggests that including sequences with mismatches contribute to a minor proportion of the total number of small RNAs in this region.

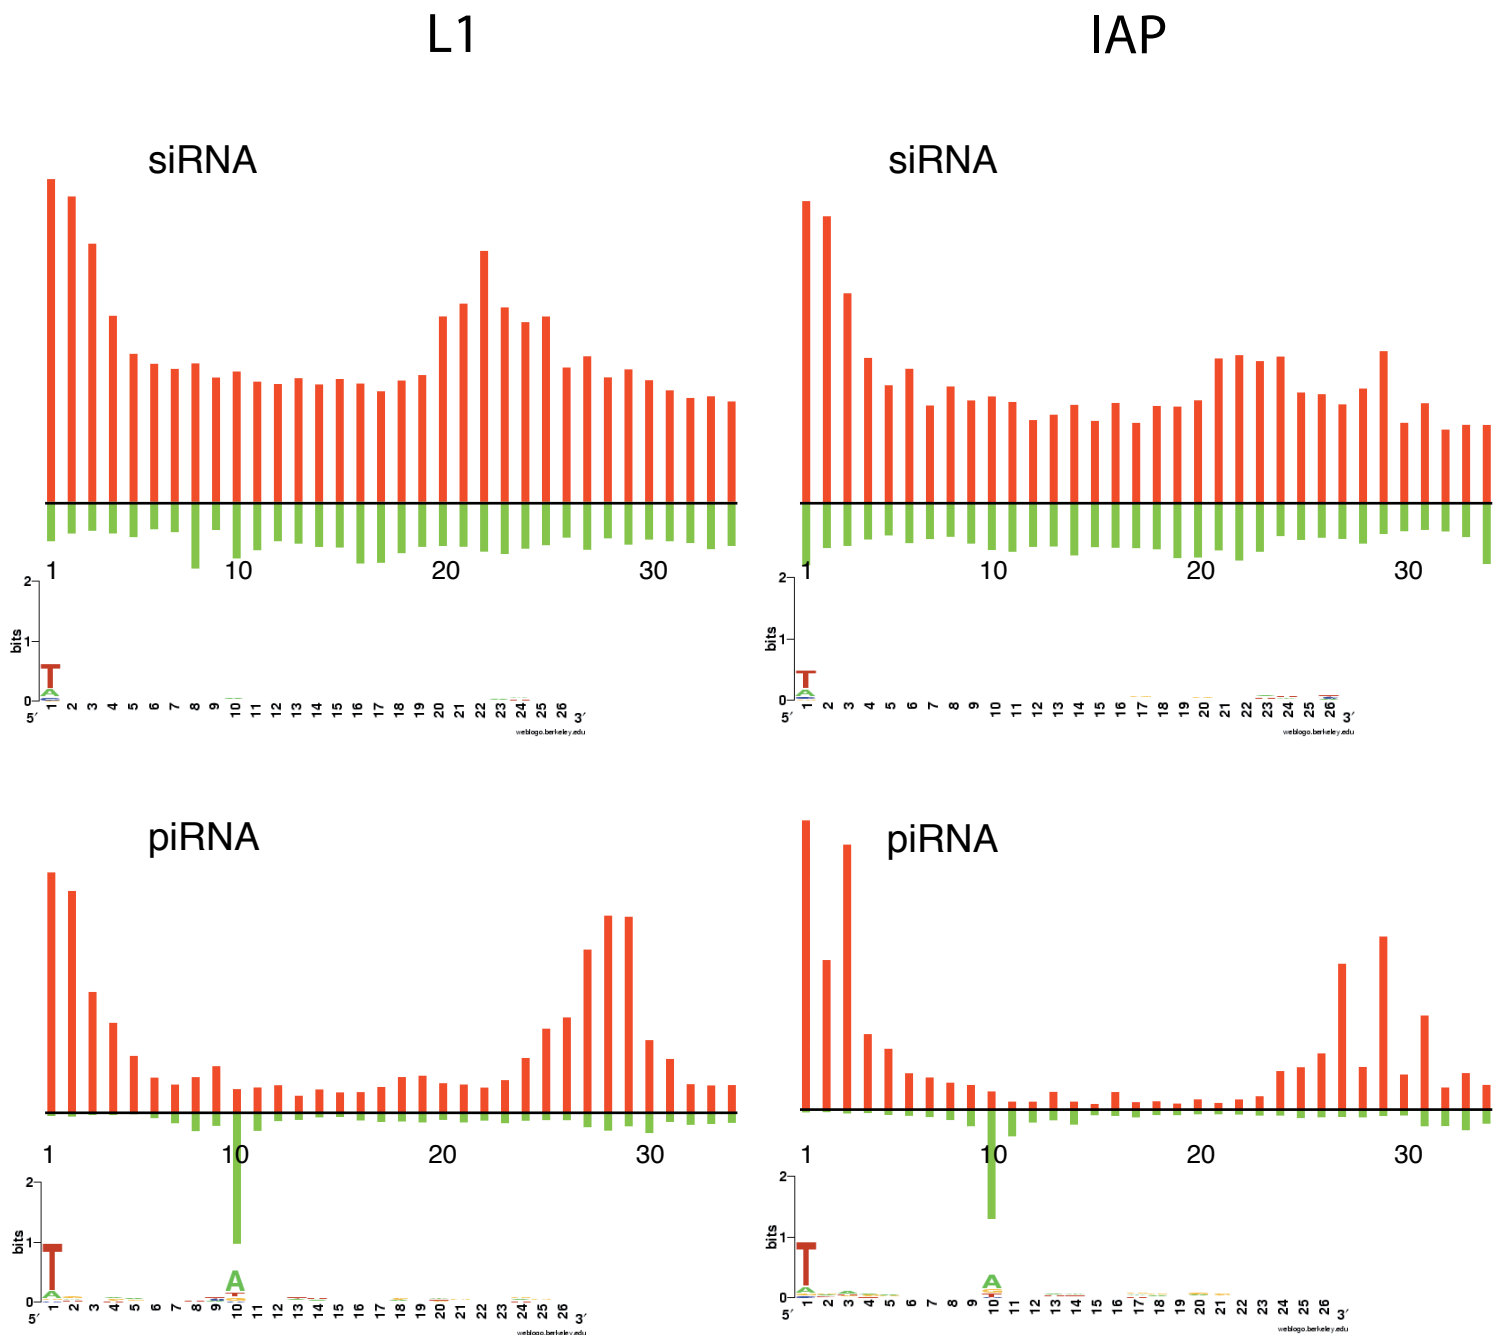

Figure S2. Properties of oocyte siRNAs and piRNAs. Upper plots (bar graphs) show the relative frequencies of small RNAs with a 5' end at the indicated distance from another siRNA or piRNA (as indicated) on the same strand (red) or the opposite strand (green). Plots were created for sequences matching to L1 or IAP, as indicated. In the piRNA plots, a clear peak at position 10 on the lower strand can be seen for both L1 and IAP. This indicates the 10 nucleotide overlap between two complementary piRNAs that is a signature of the Ping-Pong amplification cycle. Notably, peaks on the same strand for 5' ends that are ~22 and ~27-29 nucleotides distant can be seen for siRNAs and piRNAs respectively. This indicates some degree of phasing in these populations. The bar for position 1 is truncated to allow visualization of other bars on the graph. Nucleotide bias plots appear below each frequency graph. For piRNAs, a strong U bias at position 1 (T in the reads) can be seen. Moreover, the A at position 10 is also an indication of the Ping-Pong cycle and ongoing transposon defense. A mixture of T and A can be seen at high frequency at the 5' ends of siRNAs, with no additional nucleotide bias detected.

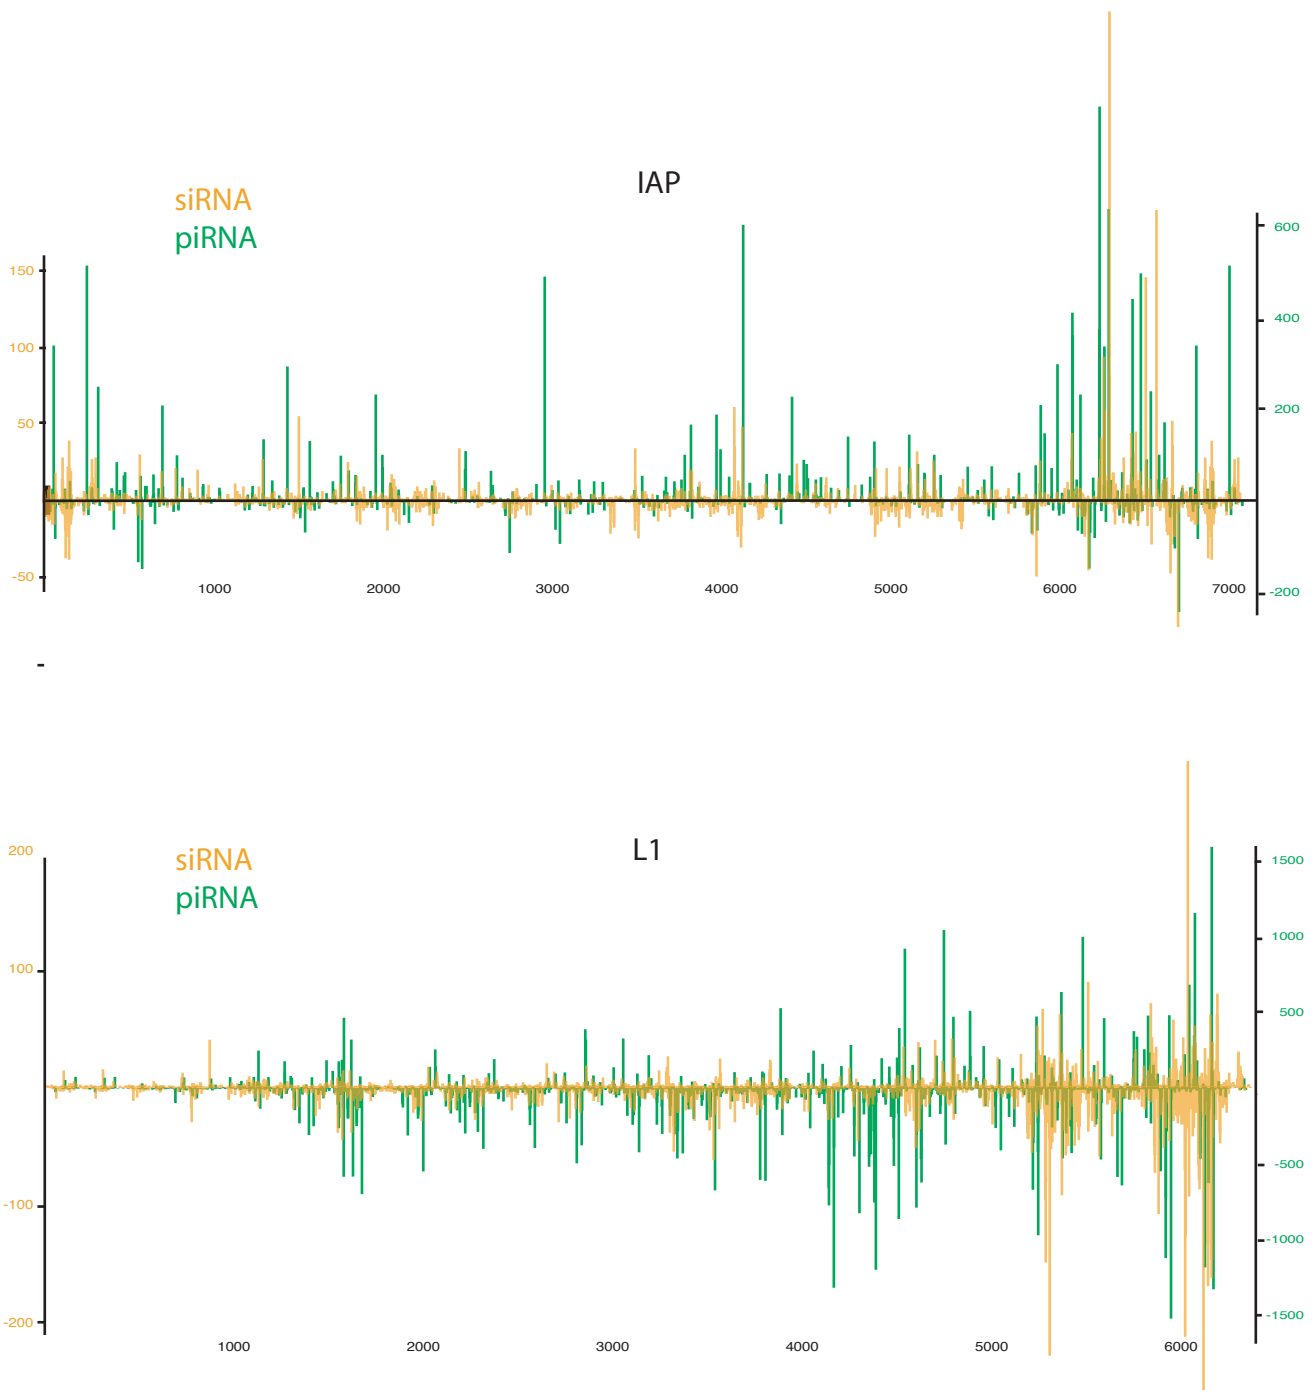

Figure S3. Distribution of piRNAs and siRNAs along L1 and IAP consensus sequences. The number of siRNAs (yellow) or piRNAs (green) whose 5' end maps with up to 3 mismatches to each position along the L1 or IAP consensus (as indicated) is shown. Each RNA class is plotted against a different Y-axis (color coded).

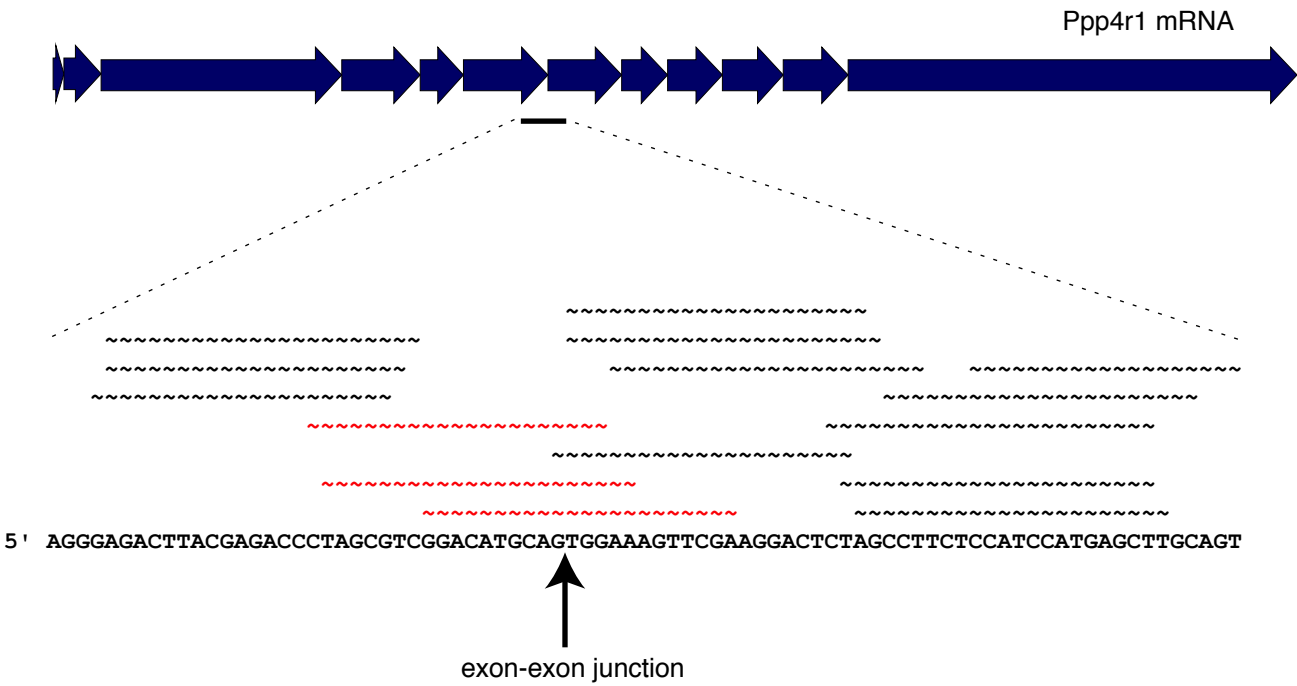

Figure S4. siRNAs that have perfect match to a segment of the Ppp4r1 mRNA near one splice junction (indicated) in the sense orientation are shown. Three siRNAs, shown in red span the exon-exon junction. These do not map directly to the genome (i.e. to pseudogenes) and thus must arise from spliced transcripts.

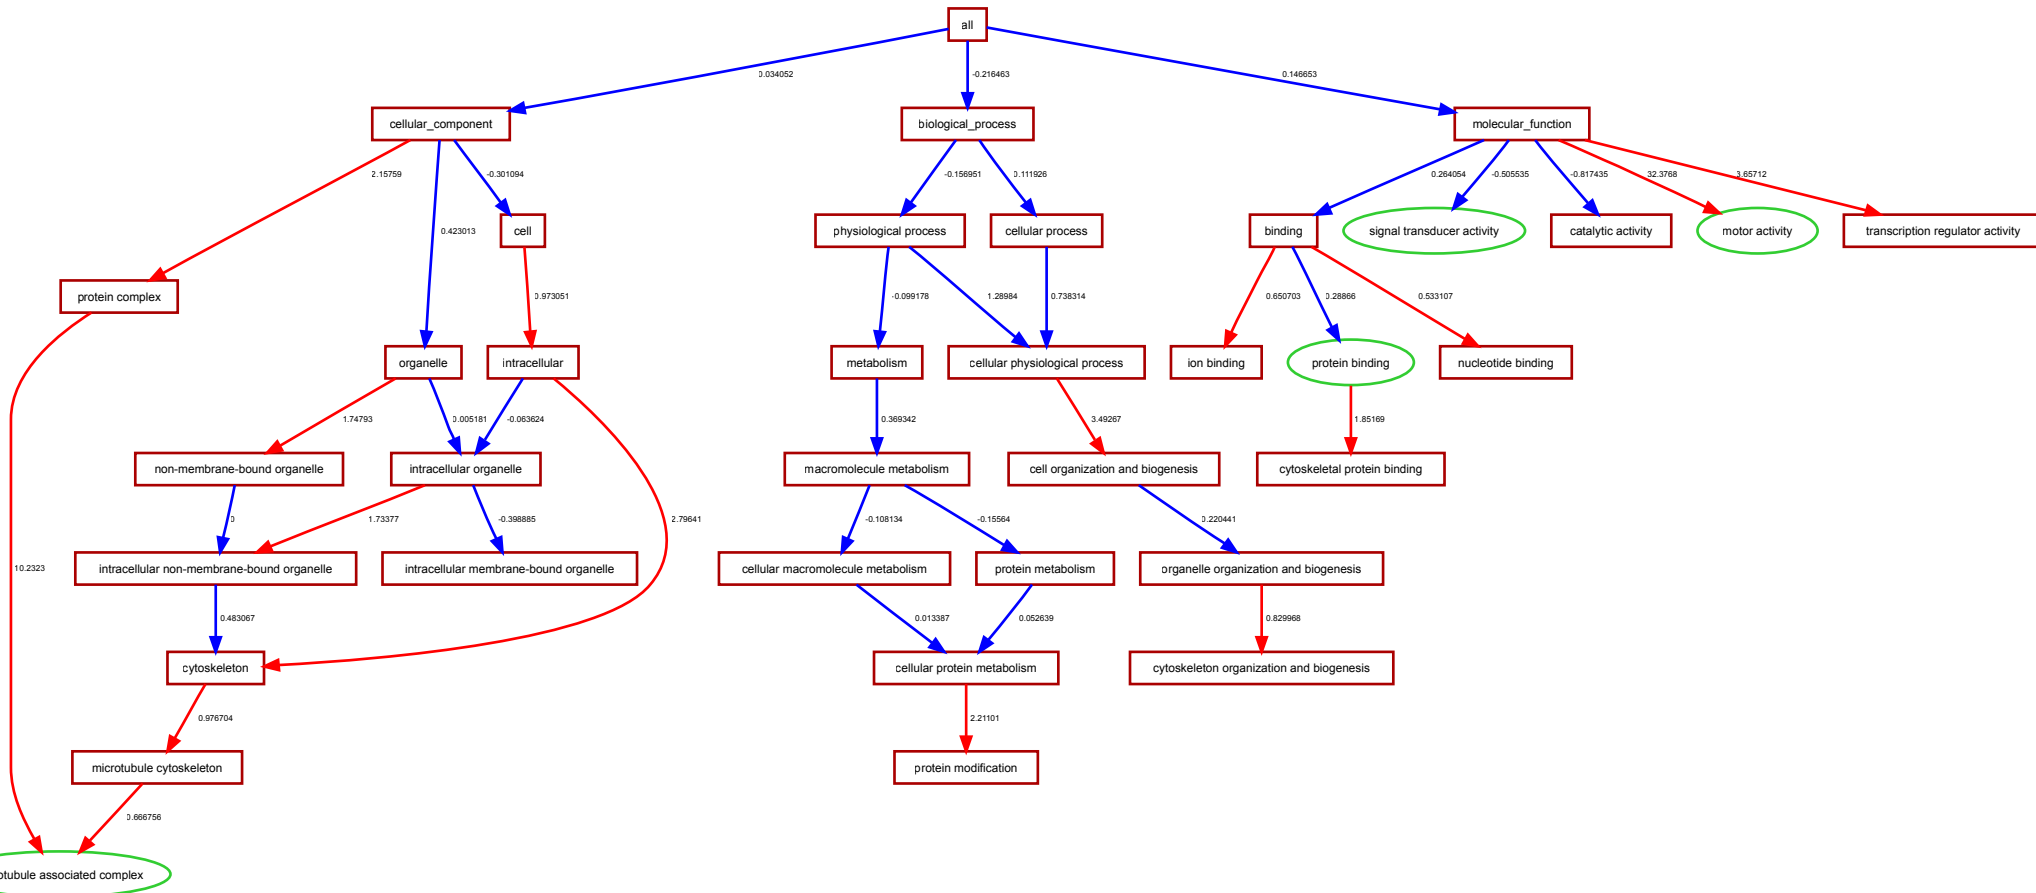

Figure S5. Enrichment in GO categories for endo-siRNA regulated genes. The 20 genes from Table 1 with the greatest fold change in the Dicer KO were analyzed for biological function using GOBAR1. Enriched groups, along with corresponding P-values, in parentheses, were GO:0007017 microtubule-based process (0), GO:0005871 kinesin complex (0), GO:0003774 motor activity (1.198218e-254), GO:0005819 spindle (8.122371e-239), GO:0005875 microtubule associated complex (3.199745e-60), GO:0005102 receptor binding (2.976938e-87), GO:0016564 transcriptional repressor activity (2.067180e-45). Categories of potential interest are highlighted in green ovals.

**Table S1 Characteristics of the oocyte small RNA populations.** The small RNA population of the two fractions are characterized based on total reads (both mapped and unmapped to genome), non-redundant sequences and clonal multiplicity. Relative percentages are also provided for most categories.

|                                  | Lower fraction |                 | Upper fraction |                 |
|----------------------------------|----------------|-----------------|----------------|-----------------|
|                                  | Number         | % (% of mapped) | Number         | % (% of mapped) |
| <b>total reads</b>               | 1568637        | 100.0           | 1216443        | 100.0           |
| mapped to genome                 | 753981         | 48.1            | 283374         | 23.3            |
| - unique                         | 396007         | 25.2 (52.5)     | 57086          | 4.7 (20.1)      |
| - multiple                       | 357974         | 22.8 (47.5)     | 226288         | 18.6 (79.9)     |
| non-mapped                       | 814656         | 51.9            | 933069         | 76.7            |
| <b>Non-redundant sequences</b>   | 623587         | 100.0           | 652490         | 100.0           |
| mapped                           | 126515         | 20.3            | 97807          | 15.0            |
| - unique                         | 46397          | 7.4 (36.7)      | 30150          | 4.6 (30.8)      |
| - multiple                       | 80118          | 12.8 (63.3)     | 67657          | 10.4 (69.2)     |
| non-mapped                       | 497072         | 79.7            | 554683         | 85.0            |
| cloned once<br>(mapped/unmapped) | 101186/461001  | 16.2/73.9       | 73715/512099   | 11.3/78.5       |
| cloned >1<br>(mapped/unmapped)   | 25329/36071    | 4.1/5.8         | 24092/42584    | 3.7/6.5         |

**Table S2. Small RNAs mapping to transposons.** The repeat-associated small RNAs are sorted into various categories of repeat-elements (LINE, SINE, LTR and others). Percentages of repeat-associated RNAs contributing to each class are also provided.

|                      | Lower fraction |         | Upper fraction |         |
|----------------------|----------------|---------|----------------|---------|
|                      | # reads        | % total | # reads        | % total |
| <b>Total</b>         | 135359         | 100     | 180380         | 100     |
| <b>LINE</b>          | 37036          | 27.4    | 114023         | 63.2    |
| <b>SINE</b>          | 9303           | 6.8     | 2396           | 1.3     |
| <b>LTR</b>           | 84827          | 62.6    | 59449          | 33.0    |
| <b>MT</b>            | 44980          | 33.2    | 19848          | 11.0    |
| <b>IAP</b>           | 12637          | 9.3     | 23763          | 13.2    |
| <b>other LTR</b>     | 27210          | 20.1    | 15838          | 8.8     |
| <b>other repeats</b> | 4193           | 3.1     | 4512           | 2.5     |



**Table S3. Genomic positions of oocyte piRNA clusters.** A comprehensive list of piRNA-generating clusters in the genome that are expressed in oocytes is given.

| <b>position</b>           | <b>size<br/>(kb)</b> | <b>unique<br/>piRNA (s/as)</b> | <b>total piRNA<br/>(s/as)</b> |
|---------------------------|----------------------|--------------------------------|-------------------------------|
| chr12:68748000-68772000   | 24                   | 0/2886                         | 6596/13571                    |
| chr10:82824000-82945000   | 121                  | 17/2685                        | 17616/23795                   |
| chr16:23105000-23112000   | 7                    | 0/1580                         | 6/1585                        |
| chr1:146067000-146072000  | 5                    | 1288/0                         | 1425/1                        |
| chr16:57387000-57392000   | 5                    | 1071/0                         | 3570/16                       |
| chr9:118580000-118585000  | 5                    | 969/0                          | 2498/20                       |
| chr17:56227000-56232000   | 5                    | 932/0                          | 1713/51                       |
| chr3:5856000-5861000      | 5                    | 0/875                          | 479/2519                      |
| chr10:43936000-43948000   | 12                   | 0/715                          | 6253/16794                    |
| chr6:47727000-47739000    | 12                   | 327/366                        | 4656/939                      |
| chr1:162961000-162969000  | 8                    | 0/625                          | 16/627                        |
| chrX:43749000-43757000    | 8                    | 589/0                          | 5288/572                      |
| chr19:8794000-8801000     | 7                    | 0/556                          | 33/586                        |
| chr10:23346000-23379000   | 33                   | 490/0                          | 27240/20908                   |
| chr6:3147000-3152000      | 5                    | 1/482                          | 929/3931                      |
| chr11:108868000-108874000 | 6                    | 473/0                          | 1207/21                       |
| chr7:118215000-118220000  | 5                    | 336/0                          | 337/0                         |
| chr13:97956000-97961000   | 5                    | 314/0                          | 962/10                        |
| chrX:50402000-50408000    | 6                    | 313/1                          | 313/1                         |
| chr4:130301000-130306000  | 5                    | 0/281                          | 2/288                         |
| chr14:31823000-31830000   | 7                    | 229/0                          | 246/50                        |
| chr16:13433000-13438000   | 5                    | 0/222                          | 18/231                        |
| chr11:68882000-68887000   | 5                    | 0/213                          | 0/215                         |
| chr4:43501000-43506000    | 5                    | 207/0                          | 1829/1393                     |
| chrX:94116000-94127000    | 11                   | 0/200                          | 2938/12824                    |
| chr8:53831000-53841000    | 10                   | 170/0                          | 10843/1983                    |
| chr5:147068000-147073000  | 5                    | 0/153                          | 7/400                         |
| chr11:106358000-106363000 | 5                    | 0/151                          | 20/183                        |
| chr10:117681000-117689000 | 8                    | 18/124                         | 152/597                       |
| chr15:82976000-82981000   | 5                    | 1/138                          | 11/175                        |
| chr4:116858000-116863000  | 5                    | 0/129                          | 12/196                        |
| chr15:79905000-79914000   | 9                    | 114/0                          | 131/12                        |
| chr10:23501000-23507000   | 6                    | 110/0                          | 116/1                         |
| chr12:110914000-110920000 | 6                    | 0/108                          | 49/108                        |
| chr14:115438000-115444000 | 6                    | 0/108                          | 8/113                         |
| chr7:19882000-19887000    | 5                    | 0/106                          | 25/109                        |
| chr10:26458000-26467000   | 9                    | 0/103                          | 488/392                       |
| chr11:48611000-48617000   | 6                    | 0/103                          | 8/107                         |
| chr6:12059000-12065000    | 6                    | 0/102                          | 1434/8664                     |
| chr2:130098000-130104000  | 6                    | 0/100                          | 2/126                         |
| chr11:77882000-77887000   | 5                    | 0/99                           | 7/121                         |
| chr10:90640000-90645000   | 5                    | 97/0                           | 115/33                        |

|                           |    |       |           |
|---------------------------|----|-------|-----------|
| chr10:26312000-26320000   | 8  | 92/0  | 4139/1605 |
| chr1:89669000-89682000    | 13 | 0/89  | 4/90      |
| chr2:144087000-144092000  | 5  | 89/0  | 101/4     |
| chr8:3750000-3755000      | 5  | 87/0  | 834/5     |
| chr5:90049000-90055000    | 6  | 0/85  | 392/702   |
| chr13:96096000-96107000   | 11 | 0/81  | 0/81      |
| chr15:64120000-64125000   | 5  | 81/0  | 81/0      |
| chr19:5792000-5803000     | 11 | 79/0  | 416/115   |
| chr16:17218000-17223000   | 5  | 0/78  | 73/442    |
| chr11:116531000-116536000 | 5  | 0/77  | 0/89      |
| chr17:35083000-35090000   | 7  | 71/0  | 81/38     |
| chr15:32167000-32172000   | 5  | 70/0  | 90/0      |
| chr15:81396000-81401000   | 5  | 0/64  | 3/147     |
| chr17:23673000-23688000   | 15 | 15/49 | 189/3529  |
| chr5:40963000-40973000    | 10 | 64/0  | 4340/2181 |
| chr13:10722000-10728000   | 6  | 63/0  | 3779/922  |
| chr18:35098000-35103000   | 5  | 62/0  | 64/6      |
| chr7:6559000-6594000      | 35 | 62/0  | 837/812   |
| chr5:108329000-108334000  | 5  | 0/61  | 4/74      |
| chr6:128967000-128975000  | 8  | 0/60  | 1624/4615 |
| chr11:62412000-62417000   | 5  | 0/59  | 5/72      |
| chr16:35977000-35982000   | 5  | 57/2  | 761/45    |
| chr18:13124000-13130000   | 6  | 0/58  | 1143/152  |
| chr2:22596000-22601000    | 5  | 58/0  | 119/16    |
| chr9:72946000-72954000    | 8  | 0/58  | 25/61     |
| chr2:122197000-122204000  | 7  | 57/0  | 421/175   |
| chr2:90231000-90236000    | 5  | 57/0  | 7861/3294 |
| chr1:88248000-88253000    | 5  | 56/0  | 61/6      |
| chr13:48627000-48634000   | 7  | 56/0  | 952/16    |
| chr4:116822000-116829000  | 7  | 55/0  | 67/39     |
| chr4:13343000-13348000    | 5  | 0/55  | 529/909   |
| chr11:77990000-77997000   | 7  | 54/0  | 55/1      |
| chr18:16219000-16232000   | 13 | 54/0  | 2317/659  |
| chr6:47925000-47930000    | 5  | 0/54  | 4/789     |
| chr6:75591000-75600000    | 9  | 0/53  | 2098/4535 |
| chr7:106624000-106632000  | 8  | 53/0  | 65/14     |
| chr16:11140000-11145000   | 5  | 0/52  | 1/35      |
| chr17:5769000-5779000     | 10 | 0/52  | 165/2339  |
| chr1:9928000-9933000      | 5  | 51/0  | 123/89    |
| chr7:82911000-82925000    | 14 | 51/0  | 214/92    |
| chr5:138602000-138607000  | 5  | 49/1  | 49/1      |

**Table S4. microRNAs in oocytes.** This table presents a list of miRNAs found in oocytes arranged from the most abundant to the least abundant.

| <b>annotation</b> | <b>reads in oocyte_lower</b> |
|-------------------|------------------------------|
| mmu-let-7c-2      | 67714                        |
| mmu-mir-322       | 45012                        |
| mmu-mir-22        | 29153                        |
| mmu-let-7f-1      | 21598                        |
| mmu-let-7a-1      | 20904                        |
| mmu-mir-16-1      | 19495                        |
| mmu-mir-503       | 19159                        |
| mmu-let-7b        | 17124                        |
| mmu-mir-26a-2     | 15965                        |
| mmu-mir-21        | 14691                        |
| mmu-let-7g        | 13048                        |
| mmu-mir-103-1     | 12016                        |
| mmu-mir-20a       | 10888                        |
| mmu-mir-672       | 9555                         |
| mmu-let-7d        | 8601                         |
| mmu-mir-29a       | 7812                         |
| mmu-mir-29b-2     | 7267                         |
| mmu-mir-130a      | 6780                         |
| mmu-let-7i        | 6748                         |
| mmu-mir-93        | 5868                         |
| mmu-mir-451       | 5676                         |
| mmu-mir-202       | 5100                         |
| mmu-mir-143       | 4897                         |
| mmu-mir-30e       | 4711                         |
| mmu-mir-26b       | 4430                         |
| mmu-mir-126       | 4324                         |
| mmu-mir-181a-1    | 4292                         |
| mmu-mir-210       | 4290                         |
| mmu-mir-351       | 4257                         |
| mmu-mir-24-1      | 4105                         |
| mmu-mir-17        | 3535                         |
| mmu-let-7e        | 3416                         |
| mmu-mir-450a-1    | 3238                         |
| mmu-mir-30d       | 3232                         |
| mmu-mir-15b       | 2950                         |
| mmu-mir-92a-1     | 2946                         |
| mmu-mir-10b       | 2779                         |
| mmu-mir-30a       | 2690                         |
| mmu-mir-34c       | 2529                         |
| mmu-mir-99a       | 2309                         |
| mmu-mir-191       | 2224                         |
| mmu-mir-125a      | 2205                         |
| mmu-mir-107       | 2171                         |
| mmu-mir-27b       | 2097                         |
| mmu-mir-181c      | 2079                         |

|                |      |
|----------------|------|
| mmu-mir-379    | 2066 |
| mmu-mir-34a    | 2037 |
| mmu-mir-99b    | 1897 |
| mmu-mir-125b-2 | 1860 |
| mmu-mir-199a-2 | 1792 |
| mmu-mir-101b   | 1785 |
| mmu-mir-320    | 1702 |
| mmu-mir-541    | 1411 |
| mmu-mir-25     | 1386 |
| mmu-mir-411    | 1299 |
| mmu-mir-151    | 1282 |
| mmu-let-7f-2   | 1279 |
| mmu-mir-127    | 1250 |
| mmu-mir-98     | 1156 |
| mmu-mir-497    | 1140 |
| mmu-mir-181b-1 | 1125 |
| mmu-mir-486    | 1121 |
| mmu-mir-195    | 1089 |
| mmu-mir-15a    | 1056 |
| mmu-mir-744    | 1012 |
| mmu-mir-181d   | 958  |
| mmu-mir-423    | 942  |
| mmu-mir-30c-2  | 877  |
| mmu-mir-23a    | 864  |
| mmu-mir-689-1  | 859  |
| mmu-mir-30b    | 813  |
| mmu-mir-23b    | 788  |
| mmu-mir-339    | 781  |
| mmu-mir-674    | 768  |
| mmu-mir-205    | 740  |
| mmu-mir-382    | 728  |
| mmu-mir-29c    | 706  |
| mmu-mir-296    | 700  |
| mmu-mir-369    | 698  |
| mmu-mir-138-2  | 681  |
| mmu-mir-324    | 678  |
| mmu-mir-542    | 647  |
| mmu-mir-18a    | 645  |
| mmu-mir-301a   | 632  |
| mmu-mir-425    | 631  |
| mmu-mir-342    | 627  |
| mmu-mir-145    | 625  |
| mmu-mir-433    | 609  |
| mmu-mir-652    | 608  |
| mmu-mir-378    | 578  |
| mmu-mir-141    | 575  |
| mmu-mir-376a   | 575  |
| mmu-mir-19b-1  | 563  |
| mmu-mir-34b    | 507  |

|                |     |
|----------------|-----|
| mmu-mir-28     | 502 |
| mmu-mir-106b   | 475 |
| mmu-mir-294    | 474 |
| mmu-mir-340    | 467 |
| mmu-mir-154    | 466 |
| mmu-mir-292    | 453 |
| mmu-mir-328    | 439 |
| mmu-mir-669a-1 | 422 |
| mmu-mir-138-1  | 409 |
| mmu-mir-10a    | 401 |
| mmu-mir-136    | 399 |
| mmu-mir-196a-1 | 394 |
| mmu-mir-200a   | 392 |
| mmu-mir-467a   | 391 |
| mmu-mir-361    | 389 |
| mmu-mir-221    | 379 |
| mmu-mir-201    | 365 |
| mmu-mir-299    | 365 |
| mmu-mir-409    | 360 |
| mmu-mir-27a    | 345 |
| mmu-mir-376b   | 345 |
| mmu-mir-140    | 343 |
| mmu-mir-450b   | 333 |
| mmu-mir-298    | 331 |
| mmu-mir-708    | 331 |
| mmu-mir-337    | 325 |
| mmu-mir-144    | 322 |
| mmu-mir-434    | 318 |
| mmu-mir-341    | 313 |
| mmu-mir-370    | 298 |
| mmu-mir-547    | 298 |
| mmu-mir-532    | 296 |
| mmu-mir-494    | 289 |
| mmu-mir-130b   | 287 |
| mmu-mir-185    | 287 |
| mmu-mir-186    | 280 |
| mmu-mir-381    | 271 |
| mmu-mir-200c   | 266 |
| mmu-mir-300    | 260 |
| mmu-mir-431    | 254 |
| mmu-mir-223    | 253 |
| mmu-mir-100    | 251 |
| mmu-mir-376c   | 249 |
| mmu-mir-155    | 247 |
| mmu-mir-805    | 246 |
| mmu-mir-214    | 236 |
| mmu-mir-665    | 235 |
| mmu-mir-218-2  | 233 |
| mmu-mir-467c   | 232 |

|                |     |
|----------------|-----|
| mmu-mir-671    | 231 |
| mmu-let-7c-1   | 217 |
| mmu-mir-134    | 215 |
| mmu-mir-128a   | 211 |
| mmu-mir-31     | 208 |
| mmu-mir-181b-2 | 205 |
| mmu-mir-872    | 200 |
| mmu-mir-455    | 198 |
| mmu-mir-484    | 187 |
| mmu-mir-182    | 186 |
| mmu-mir-669b   | 186 |
| mmu-mir-374    | 180 |
| mmu-mir-741    | 176 |
| mmu-mir-32     | 175 |
| mmu-mir-295    | 168 |
| mmu-mir-335    | 167 |
| mmu-mir-669c   | 167 |
| mmu-mir-500    | 150 |
| mmu-mir-181a-2 | 132 |
| mmu-mir-142    | 130 |
| mmu-mir-7a-1   | 130 |
| mmu-mir-871    | 126 |
| mmu-mir-429    | 125 |
| mmu-mir-487b   | 122 |
| mmu-mir-203    | 115 |
| mmu-mir-362    | 111 |
| mmu-mir-377    | 110 |
| mmu-mir-540    | 110 |
| mmu-mir-101a   | 105 |
| mmu-mir-16-2   | 102 |
| mmu-mir-19a    | 102 |
| mmu-mir-183    | 87  |
| mmu-mir-149    | 86  |
| mmu-mir-470    | 86  |
| mmu-mir-410    | 85  |
| mmu-mir-465c-1 | 85  |
| mmu-mir-297a-2 | 83  |
| mmu-mir-501    | 83  |
| mmu-mir-743a   | 83  |
| mmu-mir-615    | 82  |
| mmu-mir-676    | 82  |
| mmu-mir-291b   | 80  |
| mmu-mir-139    | 77  |
| mmu-mir-1-2    | 76  |
| mmu-mir-196a-2 | 76  |
| mmu-mir-421    | 74  |
| mmu-mir-188    | 73  |
| mmu-mir-485    | 69  |
| mmu-mir-146b   | 67  |

|                |    |
|----------------|----|
| mmu-mir-152    | 59 |
| mmu-mir-193b   | 59 |
| mmu-mir-466a   | 58 |
| mmu-mir-880    | 57 |
| mmu-mir-345    | 55 |
| mmu-mir-133a-1 | 54 |
| mmu-mir-290    | 52 |
| mmu-mir-96     | 51 |
| mmu-mir-148b   | 49 |
| mmu-mir-222    | 48 |
| mmu-mir-380    | 48 |
| mmu-mir-9-2    | 47 |
| mmu-mir-194-2  | 46 |
| mmu-mir-375    | 42 |
| mmu-mir-146a   | 40 |
| mmu-mir-190    | 40 |
| mmu-mir-291a   | 40 |
| mmu-mir-323    | 40 |
| mmu-mir-350    | 37 |
| mmu-mir-466f-1 | 37 |
| mmu-mir-200b   | 36 |
| mmu-mir-193    | 33 |
| mmu-mir-574    | 32 |
| mmu-mir-196b   | 31 |
| mmu-mir-878    | 30 |
| mmu-mir-881    | 30 |
| mmu-mir-297a-3 | 29 |
| mmu-mir-465a   | 29 |
| mmu-mir-874    | 29 |
| mmu-mir-466h   | 28 |
| mmu-mir-33     | 27 |
| mmu-mir-326    | 26 |
| mmu-mir-192    | 25 |
| mmu-mir-338    | 25 |
| mmu-mir-449a   | 25 |
| mmu-mir-125b-1 | 24 |
| mmu-mir-30c-1  | 24 |
| mmu-mir-412    | 24 |
| mmu-mir-450a-2 | 24 |
| mmu-mir-466d   | 24 |
| mmu-let-7a-2   | 23 |
| mmu-mir-743b   | 23 |
| mmu-mir-132    | 22 |
| mmu-mir-19b-2  | 21 |
| mmu-mir-224    | 21 |
| mmu-mir-543    | 21 |
| mmu-mir-700    | 21 |
| mmu-mir-103-2  | 20 |
| mmu-mir-199b   | 20 |

|               |    |
|---------------|----|
| mmu-mir-219-1 | 20 |
| mmu-mir-194-1 | 19 |
| mmu-mir-301b  | 18 |
| mmu-mir-220   | 17 |
| mmu-mir-293   | 17 |
| mmu-mir-329   | 17 |
| mmu-mir-150   | 16 |
| mmu-mir-92a-2 | 16 |
| mmu-mir-331   | 15 |
| mmu-mir-129-2 | 14 |
| mmu-mir-715   | 14 |
| mmu-mir-471   | 13 |
| mmu-mir-505   | 13 |
| mmu-mir-217   | 12 |
| mmu-mir-873   | 12 |
| mmu-mir-877   | 12 |
| mmu-mir-883a  | 12 |
| mmu-mir-20b   | 11 |
| mmu-mir-511   | 10 |
| mmu-mir-592   | 10 |
| mmu-mir-742   | 10 |



**Table S5. Potential regulatory targets of endogenous siRNAs.** The 20 genes with the largest number of siRNAs are listed. The number of siRNAs that match the protein coding mRNA corresponding to that gene with no mismatches (perfect) or with from 1 to 4 mismatches (mismatched) in the sense (s) or antisense (as) orientation are listed. Also indicated is whether siRNAs can also be mapped to a homologous pseudogene or whether convergent transcription of two annotated genes can potentially produce dsRNA.

| <b>Gene</b>   | <b>Perfect siRNA<br/>(s/as)</b> | <b>Mismatched<br/>siRNA<br/>(s/as)</b> | <b>siRNA-<br/>producing<br/>pseudogene</b> | <b>Convergent<br/>transcription<br/>of two genes</b> |
|---------------|---------------------------------|----------------------------------------|--------------------------------------------|------------------------------------------------------|
| BC003993      | 1853/1510                       | 665/648                                | -                                          | -                                                    |
| Sp110         | 475/88                          | 3606/154                               | +                                          | -                                                    |
| Rnf168        | 721/599                         | 1214/658                               | -                                          | -                                                    |
| Rangap1       | 433/925                         | 1037/779                               | +                                          | -                                                    |
| 2610016C23Rik | 245/45                          | 1857/62                                | +                                          | -                                                    |
| 2410002F23Rik | 3/157                           | 50/1679                                | -                                          | -                                                    |
| Kifc1         | 523/223                         | 253/248                                | +                                          | -                                                    |
| prc1          | 249/156                         | 226/160                                | +                                          | -                                                    |
| Lcp1          | 249/231                         | 123/153                                | +                                          | -                                                    |
| oog4          | 411/90                          | 94/74                                  | +                                          | -                                                    |
| optn          | 261/148                         | 121/92                                 | +                                          | -                                                    |
| Trim71        | 144/146                         | 179/131                                | -                                          | -                                                    |
| 1110067D22Rik | 128/62                          | 100/263                                | +                                          | -                                                    |
| Ppp4r1        | 208/92                          | 113/90                                 | +                                          | -                                                    |
| Fbxo34        | 180/132                         | 98/91                                  | +                                          | -                                                    |
| Kif4          | 189/124                         | 102/49                                 | -                                          | +                                                    |
| ncoa2         | 56/75                           | 72/250                                 | +                                          | -                                                    |
| kif2c         | 174/75                          | 97/90                                  | +                                          | -                                                    |
| Ankrd28       | 39/24                           | 219/147                                | -                                          | -                                                    |
| traip         | 199/79                          | 71/77                                  | +                                          | -                                                    |
